# Supplementary material for: The Presence of Caffeic Acid in Cerebrospinal Fluid: Evidence That Dietary Polyphenols Can Cross the Blood-Brain Barrier in Humans
Source: PubMed Central journal article supplement (PMC7284697; doi:10.3390/nu12051531), 2020-05-25
Supplement: nutrients-12-01531-s001.pdf [file nutrients-12-01531-s001.pdf]

## Supplementary Materials

**Table S1.** Individual results of 3-hydroxyphenyl acetic acid (3HPAA), homovanillic acid (HVA) and caffeic acid (CA) measurement in cerebrospinal fluid and plasma in the subgroup of patients with multiple sclerosis.

| Patient Number | Sex | Cerebrospinal Fluid [ $\mu\text{mol/L}$ ] |      |      | Plasma [ $\mu\text{mol/L}$ ] |      |      |
|----------------|-----|-------------------------------------------|------|------|------------------------------|------|------|
|                |     | 3HPAA                                     | HVA  | CA   | 3HPAA                        | HVA  | CA   |
| 1              | F   | 7.73                                      | 0.16 | 0.03 | 0.00                         | 0.07 | 0.03 |
| 2              | F   | 0.00                                      | 0.15 | 0.02 | 0.00                         | 0.07 | 0.03 |
| 3              | F   | 39.15                                     | 0.22 | 0.03 | 4.12                         | 0.13 | 0.02 |
| 4              | F   | 6.92                                      | 0.20 | 0.01 | 0.00                         | 0.10 | 0.03 |
| 5              | F   | 7.13                                      | 0.29 | 0.03 | 0.00                         | 0.07 | 0.02 |
| 6              | M   | 4.50                                      | 0.07 | 0.03 | 0.00                         | 0.08 | 0.03 |
| 7              | F   | 5.82                                      | 0.37 | 0.03 | 0.00                         | 0.09 | 0.03 |
| 8              | F   | 3.14                                      | 0.27 | 0.03 | 0.00                         | 0.07 | 0.03 |
| 9              | F   | 3.01                                      | 0.10 | 0.02 | 0.00                         | 0.07 | 0.03 |
| 10             | F   | 2.33                                      | 0.15 | 0.00 | 0.00                         | 0.08 | 0.03 |
| 11             | F   | 2.17                                      | 0.23 | 0.02 | 0.00                         | 0.13 | 0.02 |
| 12             | F   | 1.19                                      | 0.12 | 0.03 | 0.00                         | 0.11 | 0.03 |
| 13             | M   | 3.40                                      | 0.09 | 0.03 | 0.00                         | 0.07 | 0.03 |
| 14             | F   | 17.41                                     | 0.16 | 0.03 | 1.43                         | 0.10 | 0.03 |
| 15             | F   | 17.96                                     | 0.30 | 0.03 | 0.93                         | 0.08 | 0.01 |

**Table 2.** Individual results of 3-hydroxyphenyl acetic acid (3HPAA), homovanillic acid (HVA) and caffeic acid (CA) measurement in cerebrospinal fluid and plasma in the subgroup of patients with other neurological disorders.

| Patient Number | Sex | Cerebrospinal Fluid [ $\mu\text{mol/L}$ ] |      |      | Plasma [ $\mu\text{mol/L}$ ] |      |      |
|----------------|-----|-------------------------------------------|------|------|------------------------------|------|------|
|                |     | 3HPAA                                     | HVA  | CA   | 3HPAA                        | HVA  | CA   |
| 1              | F   | 10.19                                     | 0.42 | 0.02 | 9.93                         | 0.16 | 0.03 |
| 2              | F   | 9.00                                      | 0.11 | 0.02 | 0.00                         | 0.11 | 0.03 |
| 3              | M   | 2.42                                      | 0.47 | 0.04 | 0.00                         | 0.16 | 0.04 |
| 4              | M   | 2.63                                      | 0.33 | 0.02 | 0.00                         | 0.12 | 0.03 |
| 5              | M   | 3.18                                      | 0.16 | 0.02 | 0.00                         | 0.15 | 0.04 |
| 6              | M   | 19.53                                     | 0.23 | 0.02 | 0.00                         | 0.10 | 0.04 |
| 7              | M   | 2.38                                      | 0.06 | 0.04 | 0.00                         | 0.12 | 0.03 |
| 8              | F   | 24.75                                     | 0.15 | 0.02 | 4.00                         | 0.07 | 0.04 |
| 9              | F   | 3.74                                      | 0.27 | 0.02 | 0.00                         | 0.11 | 0.03 |
| 10             | M   | 11.59                                     | 0.23 | 0.02 | 0.00                         | 0.16 | 0.04 |
| 11             | M   | 4.20                                      | 0.07 | 0.02 | 0.00                         | 0.13 | 0.03 |
| 12             | M   | 2.51                                      | 0.17 | 0.02 | 0.00                         | 0.05 | 0.03 |
| 13             | M   | 4.97                                      | 0.19 | 0.02 | 0.00                         | 0.07 | 0.03 |
